# Supplementary material
Source: publisher figshare collection journal article supplement (https://frontiersin.figshare.com/ndownloader/files/12471077)
Supplement: Supplementary file [file 12471077]

## *Supplementary Material*

### **Title:**

# **Patient Selection in Human Papillomavirus Related Oropharyngeal Cancer: The Added Value of Prognostic Models in the New TNM 8<sup>th</sup> Edition Era**

**Running title:** Patient-selection in HPV+ Oropharyngeal Cancer

Sarah Deschuymmer, Rüveyda Dok, Annouschka Laenen, Esther Hauben, Sandra Nuyts\*.

\* **Correspondence:** [Sandra.nuyts@uzleuven.be](mailto:Sandra.nuyts@uzleuven.be)

### **Supplementary Tables and Figures:**

**S1:** Comparison of TNM 7<sup>th</sup> edition and 8<sup>th</sup> edition of the T- and N-stages and the number of included patients for each T- and N-stage.

**S2:** Predictors for overall survival in univariable (**A**) and multivariable (**B**) cox regression analysis.

**S3:** Patient and tumor characteristics separated by risk group according to the new proposed classification model.

**S4:** Locoregional control calculated with the cumulative incidence method with death as competing factor for the risk groups defined in figure 10.

**S5:** Kaplan-Meier curve for overall survival by N-stage (**A**) and T-stage (**B**) according to the TNM 8<sup>th</sup> edition for HPV positive oropharyngeal squamous cell carcinoma.

**S6:** Tumor volume of HPV+ OPC according to T-Stage.

**S3:** Patient and tumor characteristics by risk group according to the new proposed classification model.  
 IQR: Interquartile range; ACE27: Adult Comorbidity Evaluation 27.

|                                       | <b>Low risk</b>  | <b>Intermediate risk</b> | <b>High risk</b> |
|---------------------------------------|------------------|--------------------------|------------------|
| <b>Gender</b>                         |                  |                          |                  |
| Male                                  | 11/18 (61.11%)   | 20/25 (80.00%)           | 45/57 (78.95%)   |
| Female                                | 7/18 (38.89%)    | 5/25 (20.00%)            | 12/57 (21.05%)   |
| <b>Age</b>                            |                  |                          |                  |
| Median (IQR)                          | 63.4 (52.0-69.0) | 61.5 (54.2-72)           | 63.5 (54.7-69.9) |
| <b>Smoking</b>                        |                  |                          |                  |
| Never smoker                          | 11/18 (61.11%)   | 1/25 (4.00%)             | 15/57 (26.32%)   |
| ≤ 10 Pack years                       | 7/18 (38.89%)    | 2/25 (8.00%)             | 5/57 (8.77%)     |
| > 10 Pack years                       | -                | 20/25 (80.00%)           | 36/57 (63.16%)   |
| Unknown                               |                  | 2/25 (8.00%)             | 1/57 (1.75%)     |
| <b>Systemic Treatment</b>             |                  |                          |                  |
| No                                    | 8/18 (44.44%)    | 8/25 (32.00%)            | 15/57 (26.32%)   |
| Yes                                   | 10/18 (55.56%)   | 17/25 (68.00%)           | 42/57 (73.68%)   |
| <b>Comorbidity: ACE27</b>             |                  |                          |                  |
| 0-1                                   | 18/18 (100%)     | 14/25 (56.00%)           | 36/57 (63.16%)   |
| 2-3                                   | -                | 11/25 (44.00%)           | 21/57 (36.84%)   |
| <b>Stage (7<sup>th</sup> edition)</b> |                  |                          |                  |
| I                                     | -                | -                        | -                |
| II                                    | 5/18 (27.78%)    | 5/25 (20.00%)            | -                |
| III                                   | 4/18 (22.22%)    | 2/25 (8.00%)             | 5/57 (8.77%)     |
| IV                                    | 9/18 (50.00%)    | 18/25 (72.00%)           | 52/57 (91.23%)   |
| <b>Stage (8<sup>th</sup> edition)</b> |                  |                          |                  |
| I                                     | 18/18 (100%)     | 25/25 (100%)             | -                |
| II                                    | -                | -                        | 23/57 (40.39%)   |
| III                                   | -                | -                        | 34/57 (59.62%)   |
